# Supplementary material for: Effectiveness and Utilization of Cardiac Rehabilitation Among People With CKD
Source: PubMed Central journal article supplement — Kidney Int Rep. 2021 Mar 30;6(6):1537–47. doi: 10.1016/j.ekir.2021.03.889 (PMC8207316; doi:10.1016/j.ekir.2021.03.889), 2021-03-30
Supplement: mmc1.pdf [file mmc1.pdf]

**Supplemental Table 1. Distribution of characteristics by program attendance, and completion**

| Characteristic           | Referred but did not start | Started but did not complete | Completed        |
|--------------------------|----------------------------|------------------------------|------------------|
| N                        | 3,468 (28.7)               | 3,414 (28.3)                 | 5,202 (43.1)     |
| Age, y                   |                            |                              |                  |
| 18-39                    | 22.4 (17.3,27.4)           | 32.0 (26.3,37.6)             | 45.7 (39.6,51.8) |
| 40-64                    | 22.7 (21.6,23.7)           | 28.4 (27.2,29.6)             | 48.9 (47.6,50.2) |
| 65-79                    | 35.7 (34.0,37.4)           | 23.3 (21.8,24.7)             | 41.0 (39.3,42.7) |
| 80+                      | 58.0 (53.7,62.2)           | 20.7 (17.4,24.0)             | 21.3 (18.0,24.7) |
| Female                   | 31.8 (29.7,33.8)           | 27.0 (25.1,29.0)             | 41.2 (39.1,43.4) |
| South-Asian              | 33.8 (30.5,37.1)           | 24.7 (21.9,27.5)             | 41.5 (38.2,44.9) |
| Rural                    | 46.7 (42.0,51.4)           | 23.6 (19.8,27.4)             | 29.7 (25.4,33.9) |
| Social assistance        | 41.9 (35.6,48.1)           | 28.3 (22.7,33.8)             | 29.9 (23.9,35.9) |
| Low-income neighbourhood | 36.1 (34.0,38.2)           | 26.2 (24.2,28.1)             | 37.7 (35.6,39.8) |
| Era                      |                            |                              |                  |
| 1996-2005                | 30.3 (27.9,32.6)           | 11.1 (9.6,12.7)              | 58.6 (56.1,61.1) |
| 2006-2010                | 35.1 (33.6,36.5)           | 16.4 (15.3,17.5)             | 48.5 (47.0,50.0) |
| 2011-2016                | 20.1 (19.0,21.2)           | 45.6 (44.2,46.9)             | 34.3 (33.0,35.6) |
| Smoker                   | 36.1 (34.3,38.0)           | 29.5 (27.8,31.3)             | 34.3 (32.6,36.1) |
| ACS referral             | 26.2 (25.2,27.2)           | 27.6 (26.6,28.7)             | 46.2 (45.0,47.3) |
| Comorbidity              |                            |                              |                  |
| CKD                      | 34.0 (31.2,36.8)           | 25.9 (23.1,28.7)             | 40.1 (37.0,43.2) |
| Albuminuria              | 31.1 (27.7,34.5)           | 28.1 (24.7,31.5)             | 40.8 (37.0,44.6) |
| Alcohol misuse           | 38.1 (33.2,43.0)           | 29.5 (25.0,34.0)             | 32.4 (27.5,37.3) |
| Atrial fibrillation      | 30.6 (27.5,33.7)           | 24.5 (21.4,27.6)             | 44.9 (41.3,48.5) |
| Cancer                   | 32.5 (28.1,36.8)           | 27.4 (23.2,31.6)             | 40.2 (35.5,44.8) |
| Chronic heart failure    | 33.0 (29.6,36.3)           | 25.0 (21.7,28.3)             | 42.0 (38.2,45.7) |
| COPD                     | 31.5 (29.1,34.0)           | 27.4 (24.9,29.9)             | 41.1 (38.3,43.8) |
| Depression               | 30.5 (27.6,33.4)           | 27.8 (25.0,30.7)             | 41.7 (38.5,44.8) |
| Diabetes                 | 33.5 (31.5,35.5)           | 28.2 (26.3,30.1)             | 38.3 (36.3,40.4) |
| Hypertension             | 29.6 (28.5,30.8)           | 26.1 (25.0,27.2)             | 44.3 (43.0,45.5) |
| Hyperlipidemia           | 28.7 (27.6,29.8)           | 26.4 (25.4,27.5)             | 44.9 (43.7,46.1) |
| Obesity                  | 27.2 (25.5,28.8)           | 28.2 (26.5,29.9)             | 44.6 (42.8,46.5) |
| PVD                      | 31.1 (27.3,34.9)           | 27.8 (24.0,31.6)             | 41.1 (36.8,45.3) |
| Stroke                   | 33.4 (29.0,37.8)           | 29.2 (24.5,33.8)             | 37.5 (32.6,42.3) |

ACS acute coronary syndrome, CI confidence interval, CKD chronic kidney disease, COPD chronic obstructive pulmonary disease, PVD peripheral vascular disease, RRR relative risk ratio, RRT renal replacement therapy

The multinomial logistic regression model is adjusted for age, gender, South-Asian or not, rural or urban, social assistance, low-income neighbourhood, era (1996-2005,2006-2010,2011-2016), smoking status, ACS referral and 14 co-morbidities (chronic kidney disease, albuminuria, alcohol misuse, atrial fibrillation, metastatic cancer, heart failure, chronic obstructive pulmonary disease, depression, diabetes mellitus, hypertension, hyperlipidemia, obesity, peripheral vascular disease, and cerebrovascular disease).

Percentages (95% confidence intervals) are presented. Percentages for missing albuminuria and missing obesity status are not reported.

**Supplemental Table 2. All-cause death associated with starting and completing the program**

| <b>Characteristic</b>    | <b><i>Started but did not complete vs those referred but did not start</i></b><br><b>HR (95% CI)</b> | <b><i>Completed vs those who started but did not complete</i></b><br><b>HR (95% CI)</b> |
|--------------------------|------------------------------------------------------------------------------------------------------|-----------------------------------------------------------------------------------------|
| Starter                  | 0.29 (0.19,0.44)                                                                                     | 0.19 (0.09,0.43)                                                                        |
| CKD                      | 0.97 (0.60,1.55)                                                                                     | 1.18 (0.53,2.62)                                                                        |
| Starter*CKD interaction  | 1.93 (0.89,4.18)                                                                                     | 1.25 (0.28,5.68)                                                                        |
| Age, y                   | 1.03 (1.01,1.05)                                                                                     | 1.05 (1.02,1.09)                                                                        |
| Female                   | 1.14 (0.78,1.67)                                                                                     | 0.69 (0.31,1.51)                                                                        |
| South-Asian              | 1.02 (0.55,1.88)                                                                                     | 1.61 (0.65,3.99)                                                                        |
| Rural                    | 1.00 (0.46,2.15)                                                                                     | 1.50 (0.44,5.07)                                                                        |
| Social assistance        | 1.32 (0.53,3.25)                                                                                     | 0.77 (0.10,6.00)                                                                        |
| Low-income neighbourhood | 1.17 (0.79,1.72)                                                                                     | 0.89 (0.42,1.85)                                                                        |
| Era                      |                                                                                                      |                                                                                         |
| 1996-2005                | 1.00                                                                                                 | 1.00                                                                                    |
| 2006-2010                | 1.00 (0.57,1.77)                                                                                     | 0.45 (0.17,1.15)                                                                        |
| 2011-2016                | 1.49 (0.86,2.58)                                                                                     | 0.52 (0.22,1.22)                                                                        |
| Smoker                   | 1.02 (0.67,1.56)                                                                                     | 1.18 (0.57,2.41)                                                                        |
| Referral due to ACS      | 1.13 (0.79,1.61)                                                                                     | 1.03 (0.55,1.92)                                                                        |
| Comorbidity              |                                                                                                      |                                                                                         |
| Albuminuria              | 1.10 (0.67,1.80)                                                                                     | 1.51 (0.66,3.46)                                                                        |
| Missing                  | 1.06 (0.71,1.59)                                                                                     | 1.27 (0.63,2.54)                                                                        |
| Alcohol misuse           | 2.07 (1.11,3.86)                                                                                     | 2.40 (0.82,7.01)                                                                        |
| Atrial fibrillation      | 2.62 (1.77,3.88)                                                                                     | 2.28 (1.13,4.58)                                                                        |
| Metastatic cancer        | 3.32 (2.13,5.18)                                                                                     | 3.37 (1.57,7.23)                                                                        |
| Chronic heart failure    | 2.00 (1.32,3.01)                                                                                     | 3.59 (1.80,7.18)                                                                        |
| COPD                     | 1.08 (0.72,1.60)                                                                                     | 1.25 (0.62,2.50)                                                                        |
| Depression               | 0.98 (0.56,1.72)                                                                                     | 0.90 (0.32,2.54)                                                                        |
| Diabetes                 | 2.22 (1.55,3.16)                                                                                     | 1.96 (1.06,3.61)                                                                        |
| Hypertension             | 1.03 (0.69,1.54)                                                                                     | 1.31 (0.67,2.59)                                                                        |
| Hyperlipidemia           | 0.87 (0.60,1.25)                                                                                     | 0.74 (0.40,1.36)                                                                        |
| Obesity                  | 0.72 (0.48,1.08)                                                                                     | 0.70 (0.35,1.38)                                                                        |
| Missing                  | 0.65 (0.20,2.07)                                                                                     | 1.12 (0.26,4.76)                                                                        |
| PVD                      | 1.02 (0.57,1.80)                                                                                     | 0.86 (0.29,2.52)                                                                        |
| Stroke                   | 1.44 (0.83,2.49)                                                                                     | 1.77 (0.66,4.75)                                                                        |

ACS acute coronary syndrome, CI confidence interval, CKD chronic kidney disease, COPD chronic obstructive pulmonary disease, HR hazard ratio, PVD peripheral vascular disease, TIA transient ischemic attack

**Supplemental Table 3. Clinical outcomes associated with starting and completing the program, in those with CKD vs no CKD – an inverse-weight propensity scoring sensitivity analysis**

| Clinical outcomes                                                       | CKD              | HR (95% CI)      | No CKD             | HR (95% CI)      | P for Interaction |
|-------------------------------------------------------------------------|------------------|------------------|--------------------|------------------|-------------------|
|                                                                         | Events/N (%)     |                  | Events/N (%)       |                  |                   |
| <i>Started but did not complete vs those referred but did not start</i> |                  |                  |                    |                  |                   |
| All-cause death                                                         | 40/1,322 (3.0)   | 0.61 (0.30,1.26) | 106/10,762 (1.0)   | 0.27 (0.17,0.42) | 0.06              |
| Cardiovascular death                                                    | 20/1,319 (1.5)   | 0.66 (0.23,1.91) | 40/10,751 (0.4)    | 0.33 (0.17,0.66) | 0.29              |
| All-cause hospitalization                                               | 172/1,322 (13.0) | 0.72 (0.52,0.99) | 1,014/10,762 (9.4) | 0.61 (0.53,0.71) | 0.36              |
| Cardiovascular composite                                                | 107/1,067 (10.0) | 0.66 (0.43,1.01) | 460/10,131 (4.5)   | 0.68 (0.53,0.86) | 0.92              |
| Myocardial infarction                                                   | 21/1,322 (1.5)   | 1.09 (0.40,2.93) | 79/10,762 (0.7)    | 0.89 (0.51,1.56) | 0.74              |
| Heart failure                                                           | 48/1,067 (4.5)   | 0.59 (0.31,1.10) | 174/10,131 (1.7)   | 0.62 (0.45,0.86) | 0.87              |
| Stroke/TIA                                                              | 67/1,322 (5.1)   | 0.82 (0.47,1.43) | 258/10,762 (2.4)   | 0.67 (0.48,0.94) | 0.55              |
| <i>Completed vs those who started but did not complete</i>              |                  |                  |                    |                  |                   |
| All-cause death                                                         | 13/730 (1.8)     | 0.26 (0.06,1.14) | 39/7,886 (0.5)     | 0.19 (0.09,0.41) | 0.70              |
| Cardiovascular death                                                    | 6/729 (0.8)      | 0.41 (0.05,3.09) | 16/7,880 (0.2)     | 0.19 (0.06,0.61) | 0.53              |
| All-cause hospitalization                                               | 83/730 (11.4)    | 1.22 (0.77,1.94) | 666/7,886 (8.5)    | 0.72 (0.61,0.85) | 0.04              |
| Cardiovascular composite                                                | 51/620 (8.2)     | 0.64 (0.35,1.18) | 298/7,499 (4.0)    | 0.79 (0.61,1.02) | 0.53              |
| Myocardial infarction                                                   | 12/730 (1.6)     | 0.47 (0.11,1.91) | 55/7,886 (0.7)     | 0.58 (0.32,1.05) | 0.78              |
| Heart failure                                                           | 21/620 (3.4)     | 0.27 (0.09,0.80) | 104/7,499 (1.4)    | 1.16 (0.76,1.76) | 0.01              |
| Stroke/TIA                                                              | 32/730 (4.4)     | 1.07 (0.49,2.32) | 164/7,886 (2.1)    | 0.76 (0.54,1.06) | 0.42              |

CI confidence interval, CKD chronic kidney disease, HR hazard ratio, TIA transient ischemic attack

The models are adjusted for age, gender, South-Asian or not, rural or urban, social assistance, low-income neighborhood, era (1996-2005,2006-2010,2011-2016), smoking status and 14 co-morbidities (chronic kidney disease, albuminuria, alcohol misuse, atrial fibrillation, metastatic cancer, heart failure, chronic obstructive pulmonary disease, depression, diabetes mellitus, hypertension, hyperlipidemia, obesity, peripheral vascular disease, and cerebrovascular disease). Participants with heart failure at baseline were not included in the heart failure models.

**Supplemental Table 4. Standardized differences between groups for inverse-weight propensity scoring sensitivity analysis for the time to all-cause death dataset**

| Characteristic           | Started but did not complete vs those who were referred but did not start |          | Completed vs those who started but did not complete |          |
|--------------------------|---------------------------------------------------------------------------|----------|-----------------------------------------------------|----------|
|                          | Not weighted                                                              | Weighted | Not weighted                                        | Weighted |
| Age                      | -39.2                                                                     | 6.3      | 0.3                                                 | 1.3      |
| Female                   | -13.4                                                                     | 1.8      | -7.3                                                | -0.1     |
| South-Asian              | -2.7                                                                      | 1.4      | -2.1                                                | -0.1     |
| Rural                    | -14.7                                                                     | 0.5      | -7.6                                                | 0.1      |
| Social assistance        | -10.8                                                                     | -0.2     | -9.6                                                | -0.4     |
| Low-income neighbourhood | -19.2                                                                     | 0.6      | -11.4                                               | 0.2      |
| Era                      |                                                                           |          |                                                     |          |
| 2006-2010                | -28.8                                                                     | -0.9     | 47.1                                                | 0.3      |
| 2011-2016                | 32.3                                                                      | 2.4      | -75.6                                               | -0.3     |
| Smoker                   | -14.4                                                                     | -0.3     | -19.1                                               | -0.4     |
| ACS referral             | 18.3                                                                      | 1.8      | -0.9                                                | 0.0      |
| Comorbidity              |                                                                           |          |                                                     |          |
| Albuminuria              | -13.9                                                                     | -0.5     | -8.2                                                | -0.2     |
| Missing                  | 0.3                                                                       | -1.7     | -0.9                                                | 0.2      |
| Alcohol misuse           | -10.8                                                                     | -0.6     | -12.3                                               | 0.1      |
| Atrial fibrillation      | -14.9                                                                     | 1.0      | 4.0                                                 | -1.4     |
| Cancer                   | -7.7                                                                      | -0.6     | -3.2                                                | 1.2      |
| Chronic heart failure    | -19.6                                                                     | 0.1      | -1.1                                                | 0.2      |
| COPD                     | -18.5                                                                     | 0.3      | -4.8                                                | 0.9      |
| Depression               | -5.5                                                                      | -0.7     | -3.8                                                | -0.4     |
| Diabetes                 | -19.5                                                                     | -0.5     | -12.7                                               | 0.0      |
| Hypertension             | -20.3                                                                     | 1.1      | 0.2                                                 | 0.1      |
| Hyperlipidemia           | -10.9                                                                     | -0.5     | 10.1                                                | 0.1      |
| Obesity                  | 3.1                                                                       | 0.8      | -5.0                                                | -1.4     |
| Missing                  | 5.8                                                                       | 0.2      | -4.4                                                | -0.8     |
| PVD                      | -11.3                                                                     | -1.6     | -4.8                                                | -1.2     |
| Stroke                   | -14.1                                                                     | 0.7      | -4.2                                                | -0.2     |

ACS acute coronary syndrome, CKD chronic kidney disease, COPD chronic obstructive pulmonary disease, PVD peripheral vascular disease, RRT renal replacement therapy

In percentage units of standard deviation
